# Supplementary material for: Overexpression of wheat gene TaMOR improves root system architecture and grain yield in Oryza sativa
Source: PubMed Central journal article supplement (PMC5301925; doi:10.1093/jxb/erw193), 2016-05-26
Supplement: supp_erw193_Supplementary_Figure_S1_S5__Table_S1_S5.pdf [file supp_erw193_Supplementary_Figure_S1_S5__Table_S1_S5.pdf]

# **Overexpression of wheat gene *TaMOR* improves root system architecture and grain yield in rice**

Bo Li, Dan Liu, Qiaoru Li, Xinguo Mao, Ang Li, Jingyi Wang, Xiaoping Chang,  
Ruilian Jing

National Key Facility for Crop Gene Resources and Genetic Improvement/Institute  
of Crop Science, Chinese Academy of Agricultural Sciences, Beijing 100081,  
China

Author for correspondence:

Ruilian Jing

*Tel:* +86 1082105829

*Fax:* +86 1082105829

*Email:* [jingruilian@caas.cn](mailto:jingruilian@caas.cn)

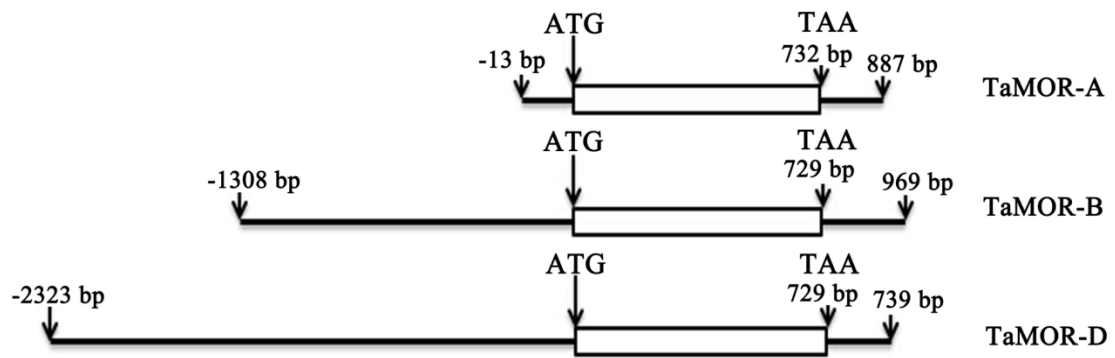

**Figure S1. The cloning regions of *TaMORs* using allele-specific primers.**

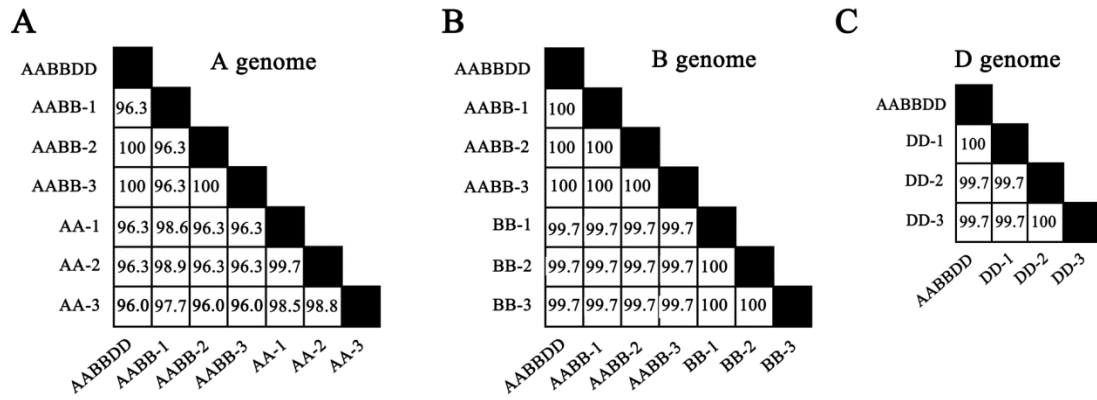

**Figure S2.** Homology of genomic nucleotide sequences. (A, B, C) Homology of A, B and D genomic nucleotide sequences between diploid accessions (AA, BB, DD), tetraploid accessions (AABB) and common wheat (AABBDD), respectively.

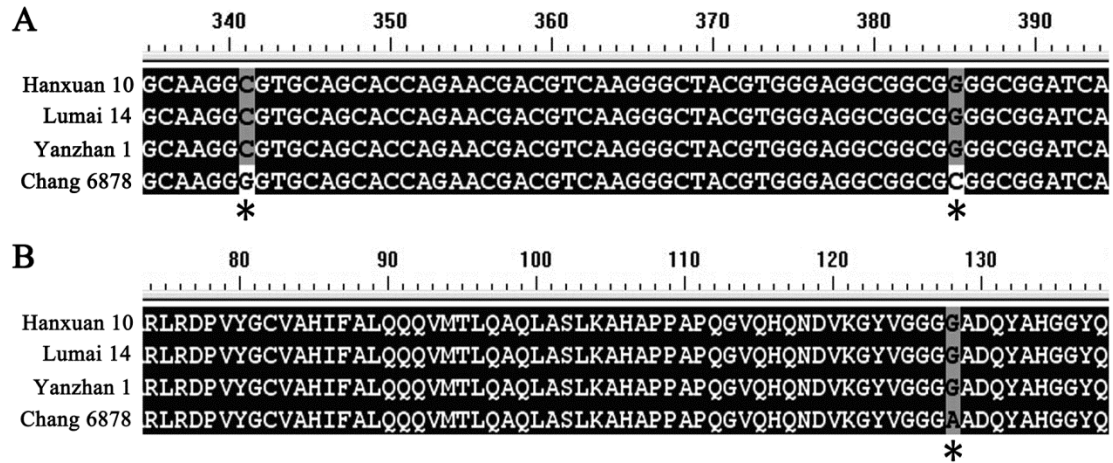

**Figure S3.** Sequence alignment of *TaMOR-B* in four modern wheat cultivars. (A) Alignment of genomic sequences among 34 unrelated modern cultivars (Table S1). (B) Alignment of amino acid sequences among 34 unrelated modern cultivars (Table S1). Hanxuan 10, Lumai 14, Yanzhan 1 and Chang 6878 are shown as examples. Shared nucleotide and amino acid sequences are shown in black background. Asterisks represent the polymorphic sites.

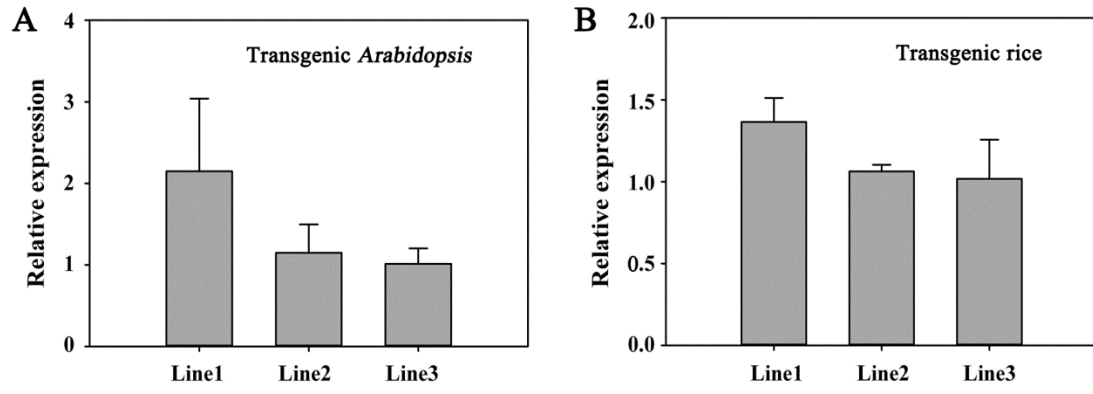

**Figure S4.** Relative expression levels of *TaMOR-D* in transgenic *Arabidopsis* (A) and rice lines (B). The error bars represent the SD of triplicate reactions.

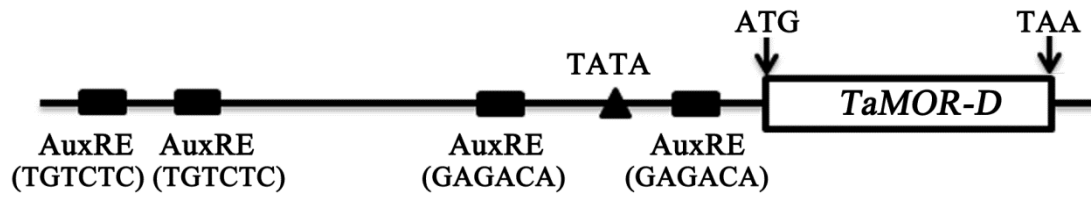

**Figure S5.** Promoter structure of *TaMOR-D*. There are four putative auxin response elements (AuxRE) and one TATA box in the 2 kb *TaMOR-D* promoter region.

**Table S1.** Cultivars used for the target gene sequence analysis

| No. | Cultivar          | Origin          | Time of release |
|-----|-------------------|-----------------|-----------------|
| 1   | Beijing 10        | Beijing, China  | 1960s           |
| 2   | Hanxuan 10        | Shanxi, China   | 1960s           |
| 3   | An 85 Zhong 124-1 | Beijing, China  | 1970s           |
| 4   | Dan R 8093        | Beijing, China  | 1970s           |
| 5   | Jingpin 10        | Beijing, China  | 1970s           |
| 6   | Jimai 6           | Hebei, China    | 1970s           |
| 7   | Changle 5         | Shandong, China | 1970s           |
| 8   | Dali 1            | Shaanxi, China  | 1970s           |
| 9   | Beijing 14        | Beijing, China  | 1980s           |
| 10  | Fengkang 13       | Beijing, China  | 1980s           |
| 11  | Jinghe 8922       | Beijing, China  | 1980s           |
| 12  | Jin 2148-7        | Fujian, China   | 1980s           |
| 13  | Changwu 131       | Shaanxi, China  | 1980s           |
| 14  | 04-030            | Beijing, China  | 1990s           |
| 15  | 04-044            | Beijing, China  | 1990s           |
| 16  | Beijing 8686      | Beijing, China  | 1990s           |
| 17  | Jing 411          | Beijing, China  | 1990s           |
| 18  | Jimai 41          | Hebei, China    | 1990s           |
| 19  | Neixiang 188      | Henan, China    | 1990s           |
| 20  | Yanzhan 1         | Henan, China    | 1990s           |
| 21  | Pandas            | Italy           | 1990s           |
| 22  | Lumai 14          | Shandong, China | 1990s           |
| 23  | Chun 9th-25       | CIMMITY, Mexico | 2000s           |
| 24  | Chun 9th-5-1      | CIMMITY, Mexico | 2000s           |
| 25  | Chun 9th-50-1     | CIMMITY, Mexico | 2000s           |
| 26  | Chang 6878        | Shanxi, China   | 2000s           |
| 27  | Liangxing 99      | Shandong, China | 2000s           |

---

|    |                  |                |          |
|----|------------------|----------------|----------|
| 28 | Linkang 5108     | Shanxi, China  | 2000s    |
| 29 | Baiqimai         | Gansu, China   | Landrace |
| 30 | Baicaomai        | Henan, China   | Landrace |
| 31 | Ziganbaimangxian | Henan, China   | Landrace |
| 32 | Cangzhouxiaomai  | Hebei, China   | Landrace |
| 33 | Hongheshang      | Shanxi, China  | Landrace |
| 34 | Chinese Spring   | Sichuan, China | Landrace |

---



**Table S2.** Primers used in the research

| Primer set     |         | Primer sequence (5'-3')          | Amplified target                     |
|----------------|---------|----------------------------------|--------------------------------------|
| P-TaMOR        | Forward | TCGGTTGATGAGCATGACG              | DNA and cDNA of<br>D, B and A genome |
|                | Reverse | GCTGGCTAGGACTAGAACCTGA           |                                      |
| P-TaMOR-D      | Forward | GCTAATGTGCTGCATACGGT             | D genome-specific                    |
|                | Reverse | GTAGTGGTTCTTACGAGCGATT           |                                      |
| P-TaMOR-B      | Forward | CTCGTGGGAATGTCTGATGC             | B genome-specific                    |
|                | Reverse | CTGTCTAGTCAACTAGCTAGGTTCC        |                                      |
| P-TaMOR-A1     | Forward | TCGGTTGATGAGCATGACG              | A genome-specific                    |
|                | Reverse | GAGACCGTTGTGCCACTG               |                                      |
| P-TaMOR-A2     | Forward | CCAGTGGCACAACGGTCTC              | A genome-specific                    |
|                | Reverse | TGATCGATCGATCGACGCA              |                                      |
| P-TaMRRP       | Forward | GGAGTTCTGGGAGCTGATCC             | cDNA of <i>TaMRRP</i>                |
|                | Reverse | CACCATAATCTCACCAACAATTT          |                                      |
| P-TaMRRP-SD    | Forward | TACCGCGTCGTGAGGAAGTT             | qRT-PCR                              |
|                | Reverse | CTCAGCCTCCATTTTCATCGA            |                                      |
| P-TaMOR-D-At   | Forward | TCCCCCGGGATGACGGGACTTGGGTC       | Expression vector<br>construction    |
|                | Reverse | CGGGATCCTTACGAGCGATTTAGGTACG     |                                      |
| P-TaMOR-D-Os   | Forward | CGGGATCCATGACGGGACTTGGGTCG       | Expression vector<br>construction    |
|                | Reverse | GGACTAGTTTACGAGCGATTTAGGTACGC    |                                      |
| P-TaMOR-RT     | Forward | GTCTTTGCGCCCTACTTCTG             | qRT-PCR and<br>RT-PCR                |
|                | Reverse | TCATGACCTGCTGCTGGAG              |                                      |
| P-Tubulin      | Forward | TGAGGACTGGTGCTTACCGC             | qRT-PCR and<br>RT-PCR in wheat       |
|                | Reverse | GCACCATCAAACCTCAGGGA             |                                      |
| P-TaMOR-D-1300 | Forward | CCCAAGCTTATGACGGGACTTGGGTCG      | Expression vector<br>construction    |
|                | Reverse | TCCCCCGGGCGAGCGATTTAGGTACGCAT    |                                      |
| P-TaMRRP-1300  | Forward | CCCAAGCTTATGAAGCCGCGGAGC         | Expression vector<br>construction    |
|                | Reverse | CGGGGTACCAGCAGTAGCCTGAACTTTTTTTG |                                      |
| P-TaMOR-D-BD   | Forward | CGGAATTCATGACGGGACTTGGGTCG       | Expression vector                    |

---

|                |         |                                    |                   |
|----------------|---------|------------------------------------|-------------------|
|                | Reverse | CGGGATCCTTAGGCGTGCGCCTTGAGC        | construction      |
| P-TaMRRP-AD    | Forward | CGGAATTCATGAAGGCCGGCGAGC           | Expression vector |
|                | Reverse | CGGGATCCTTAAGCAGTAGCCTGAACTTTTTTTG | construction      |
| P-TaMOR-D-cYFP | Forward | GGACTAGTATGACGGGACTTGGGTCG         | Expression vector |
|                | Reverse | GGGGTACCCGAGCGATTTAGGTACGCAT       | construction      |
| P-TaMRRP-nYFP  | Forward | GGACTAGTATGAAGACCGCGAGC            | Expression vector |
|                | Reverse | GGGGTACCAGCAGTAGCCTGAACTTTTTTTG    | construction      |

---

**Table S3.** The SNP sites of *TaMOR-A* in A genome

| No. | Site (bp) | AABBDD | AABB-1 | AABB-2 | AABB-3 | AA-1 | AA-2 | AA-3 |
|-----|-----------|--------|--------|--------|--------|------|------|------|
| 1   | 434       | T      | A      | T      | T      | A    | A    | A    |
| 2   | 469       | G      | G      | G      | G      | T    | G    | G    |
| 3   | 579       | C      | C      | C      | C      | C    | C    | T    |
| 4   | 583       | G      | G      | G      | G      | G    | G    | C    |
| 5   | 636       | A      | A      | A      | A      | A    | G    | A    |
| 6   | 723       | G      | T      | G      | G      | G    | T    | T    |

Seven accessions were used for sequence analysis (AABBDD, *T. aestivum*; AABB-1 ~ AABB-3, *T. dicoccoides* 1 ~ 3; AA-1 ~ AA-3, *T. urartu* 1 ~ 3).

**Table S4.** The SNP sites of *TaMOR-B* in B genome

| No. | Site (bp) | AABBDD | AABB-1 | AABB-2 | AABB-3 | BB-1 | BB-2 | BB-3 |
|-----|-----------|--------|--------|--------|--------|------|------|------|
| 1   | 12        | G      | T      | G      | G      | T    | T    | T    |
| 2   | 27        | T      | C      | T      | T      | C    | C    | C    |
| 3   | 39        | T      | C      | T      | T      | C    | C    | C    |
| 4   | 225       | C      | C      | C      | C      | G    | G    | G    |
| 5   | 228       | C      | C      | C      | C      | G    | G    | G    |
| 6   | 252       | G      | C      | G      | G      | C    | C    | C    |
| 7   | 267       | A      | G      | A      | A      | G    | G    | G    |
| 8   | 319       | G      | C      | G      | G      | G    | C    | C    |
| 9   | 321       | C      | C      | C      | C      | C    | C    | T    |
| 10  | 329       | C      | T      | C      | C      | C    | C    | C    |
| 11  | 332       | C      | C      | C      | C      | C    | C    | T    |
| 12  | 342       | C      | G      | C      | C      | G    | G    | G    |
| 13  | 343       | G      | A      | G      | G      | A    | A    | A    |
| 14  | 355       | A      | G      | A      | A      | G    | G    | G    |
| 15  | 378       | A      | G      | A      | A      | A    | A    | A    |
| 16  | 386       | G      | C      | G      | G      | C    | C    | C    |
| 17  | 401       | C      | C      | C      | C      | G    | G    | G    |
| 18  | 410       | G      | G      | G      | G      | C    | C    | C    |
| 19  | 437       | T      | C      | T      | T      | T    | T    | T    |
| 20  | 446       | C      | T      | C      | C      | T    | T    | T    |
| 21  | 453       | A      | G      | A      | A      | G    | G    | G    |
| 22  | 475       | G      | G      | G      | G      | G    | G    | A    |
| 23  | 483       | C      | T      | C      | C      | T    | T    | T    |
| 24  | 489       | A      | C      | A      | A      | C    | C    | C    |
| 25  | 490       | G      | A      | G      | G      | A    | A    | T    |
| 26  | 516       | G      | A      | G      | G      | A    | A    | G    |
| 27  | 528       | G      | T      | G      | G      | T    | T    | G    |
| 28  | 537       | A      | C      | A      | A      | C    | C    | C    |
| 29  | 591       | G      | A      | G      | G      | A    | A    | A    |
| 30  | 603       | G      | G      | G      | G      | G    | G    | C    |
| 31  | 618       | A      | G      | A      | A      | G    | G    | G    |
| 32  | 624       | C      | G      | C      | C      | G    | G    | G    |
| 33  | 705       | C      | G      | C      | C      | G    | G    | G    |
| 34  | 717       | T      | A      | T      | T      | A    | A    | A    |

Seven accessions were used for sequence analysis (AABBDD, *T. aestivum*; AABB-1 ~ AABB-3, *T. dicoccoides* 1 ~ 3; BB-1 ~ BB-3, *Ae. speltoides* 1 ~ 3).

**Table S5.** The SNP sites of *TaMOR-D* in D genome

| No. | Site (bp) | AABBDD | DD-1 | DD-2 | DD-3 |
|-----|-----------|--------|------|------|------|
| 1   | 72        | T      | T    | C    | C    |
| 2   | 366       | A      | A    | G    | G    |

Four accessions were used for sequence analysis

(AABBDD, *T. aestivum*; DD-1 ~ DD-3, *Ae.*

*tauschii* 1 ~ 3).
